# Supplementary material
Source: ML conference proceedings conference paper supplement (https://openreview.net/forum?id=28bQiPWxHl)

Example with  $\sigma_{\mathcal{X}}^2 = 0$

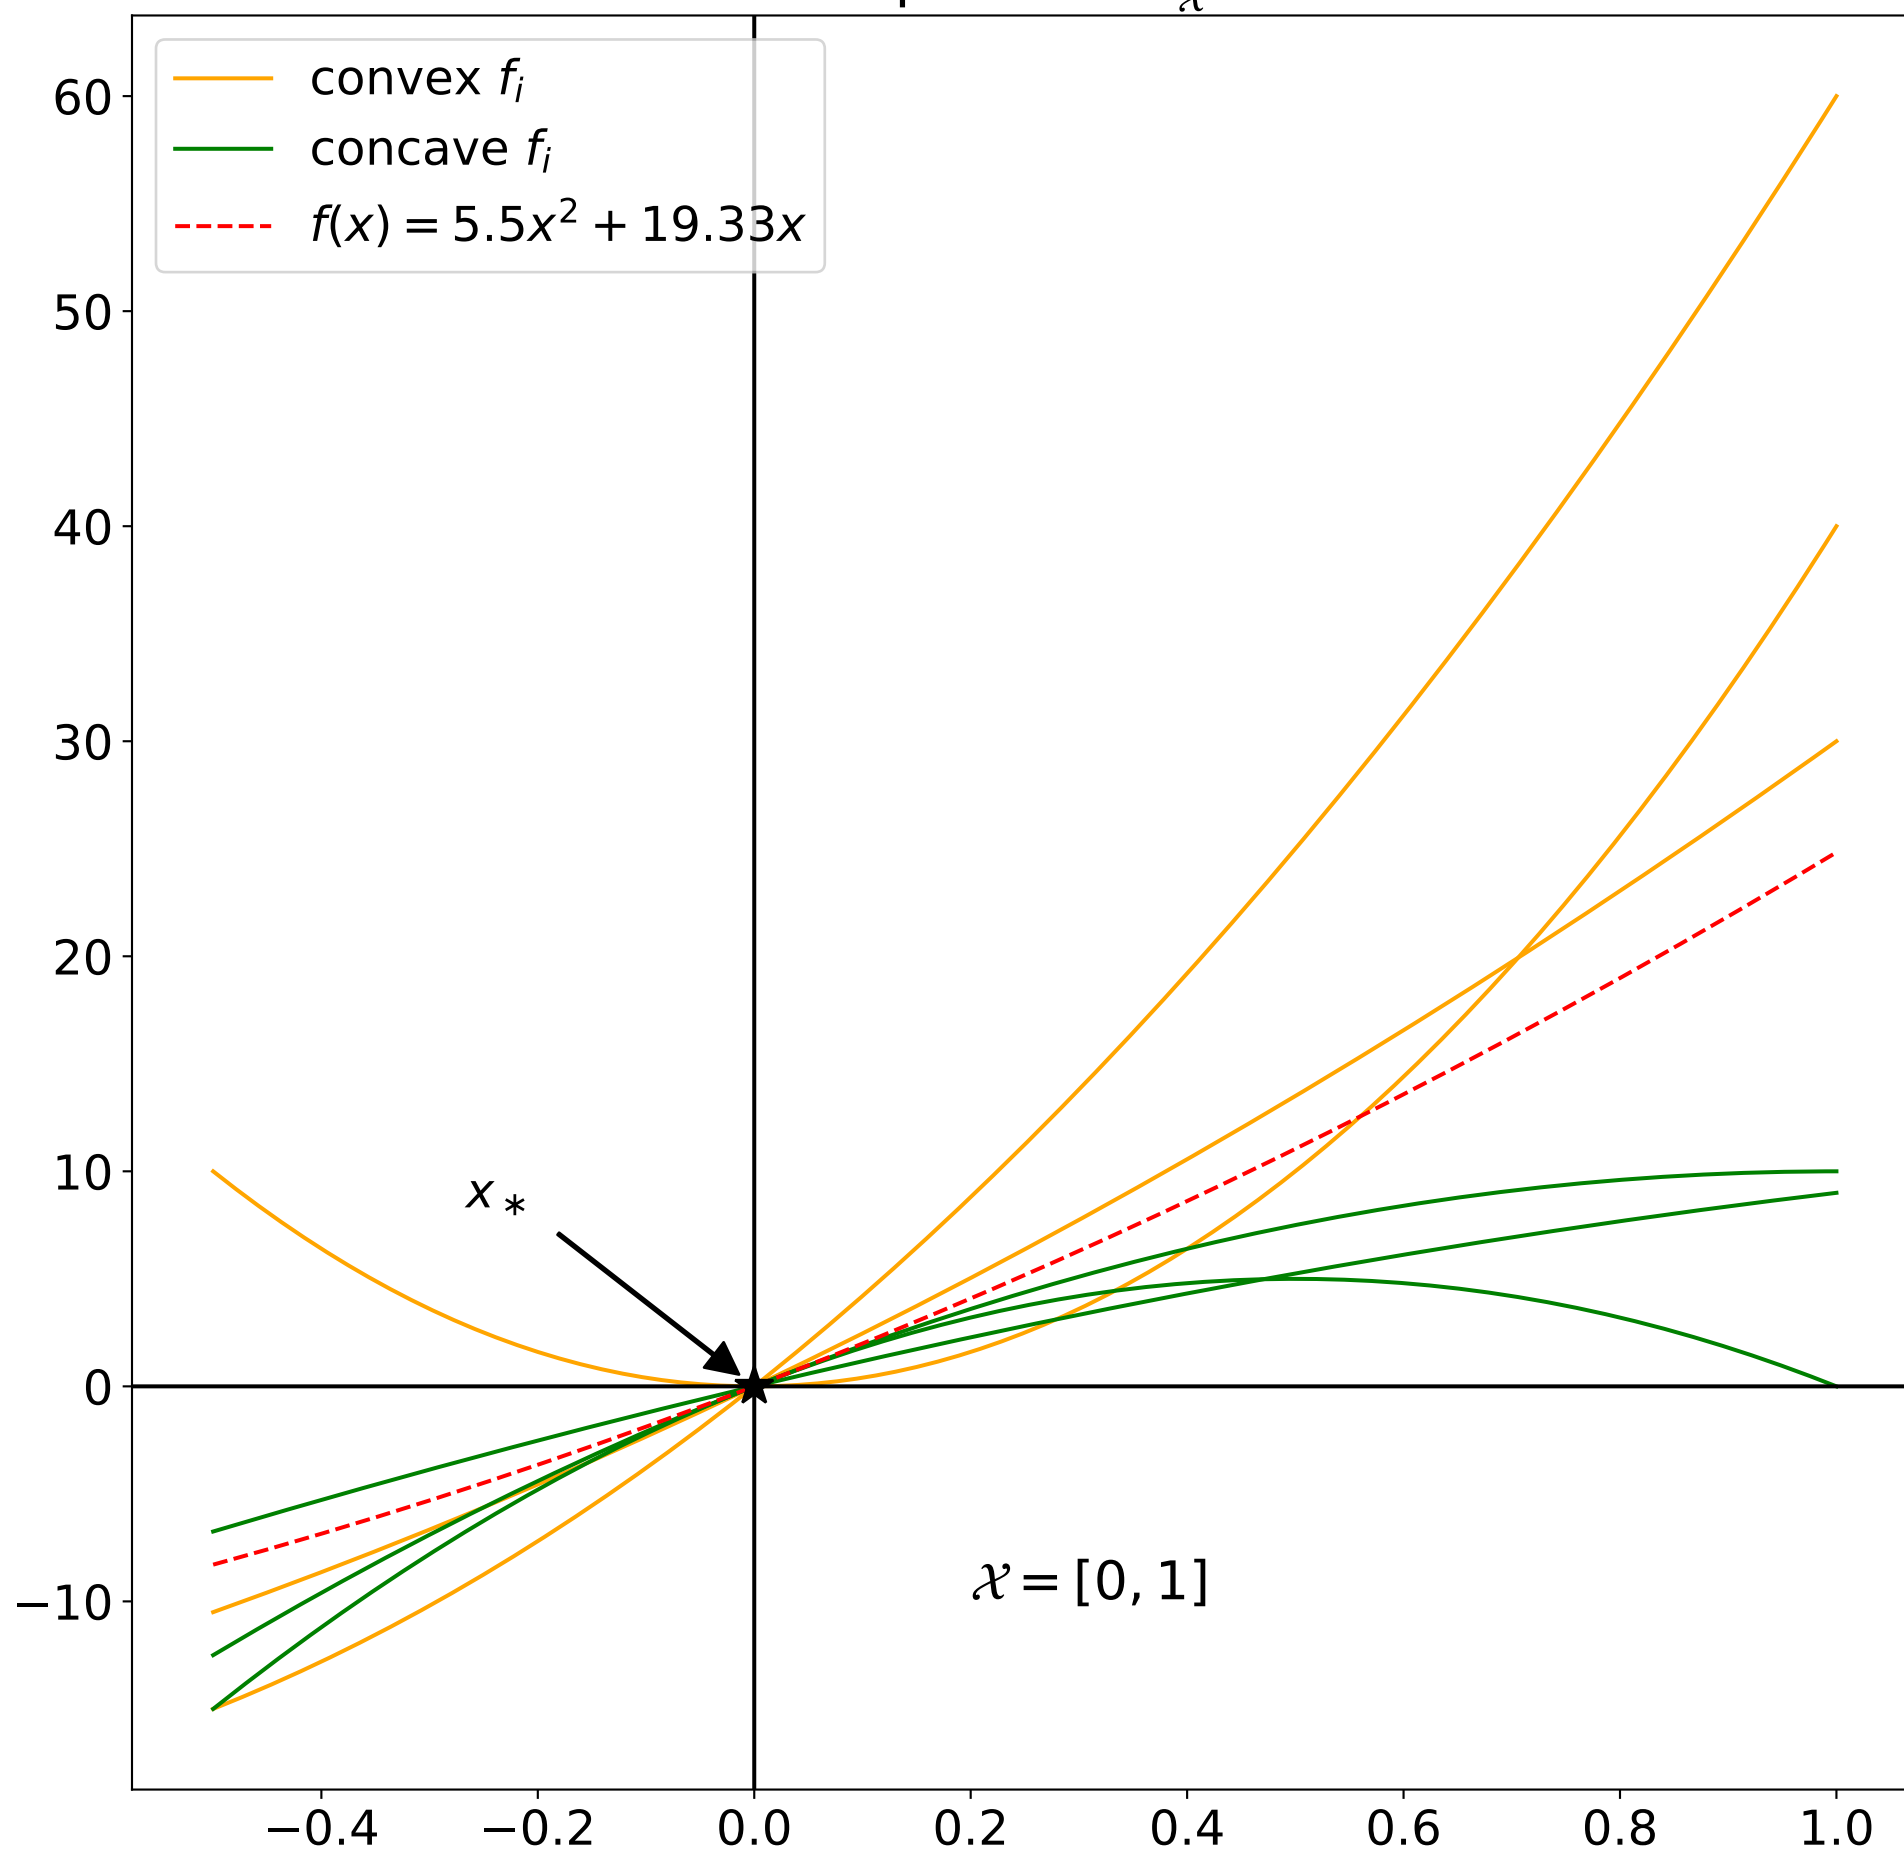

Supplement: supplementary_material [file attachment]

Euclidean Divergence to Solution

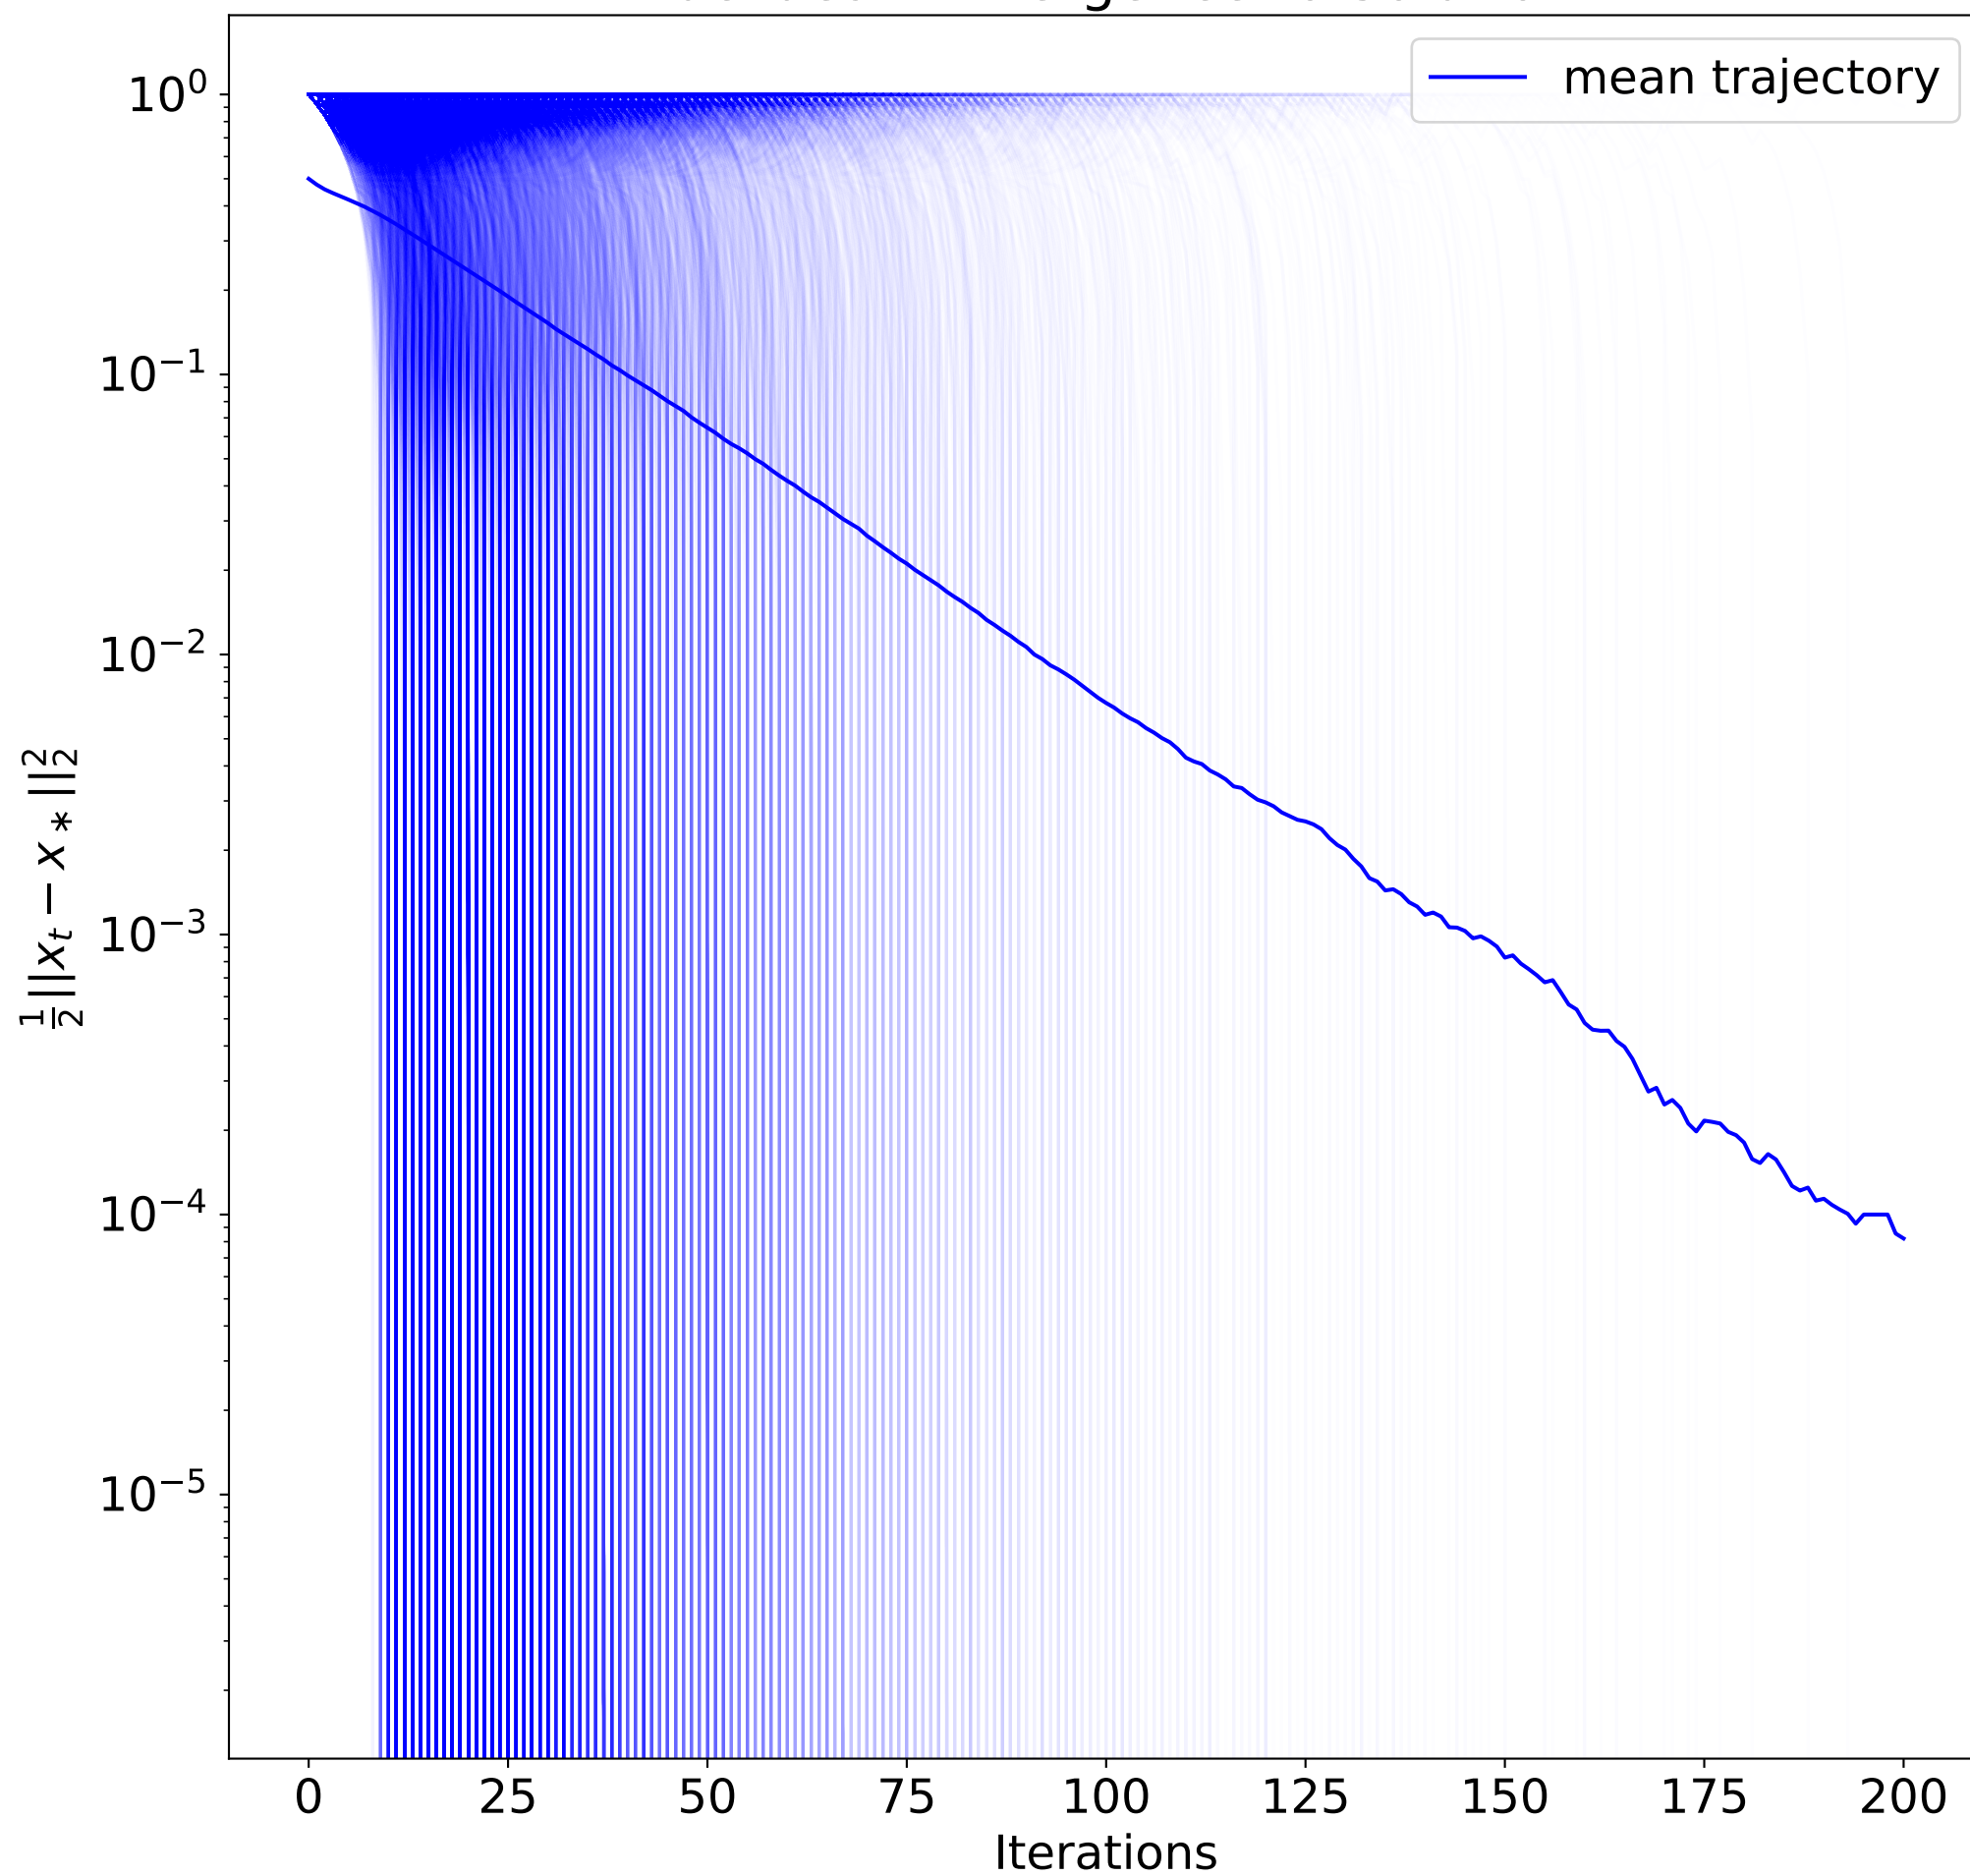

Supplement: supplementary_material [file attachment]
